# Supplementary material
Source: PubMed Central journal article supplement (PMC3913044)
Supplement: NIHMS537986-supplement-1_si_001.pdf [file NIHMS537986-supplement-1_si_001.pdf]

## **Supporting Information**

# Ramachandran Plot (glycines excluded)

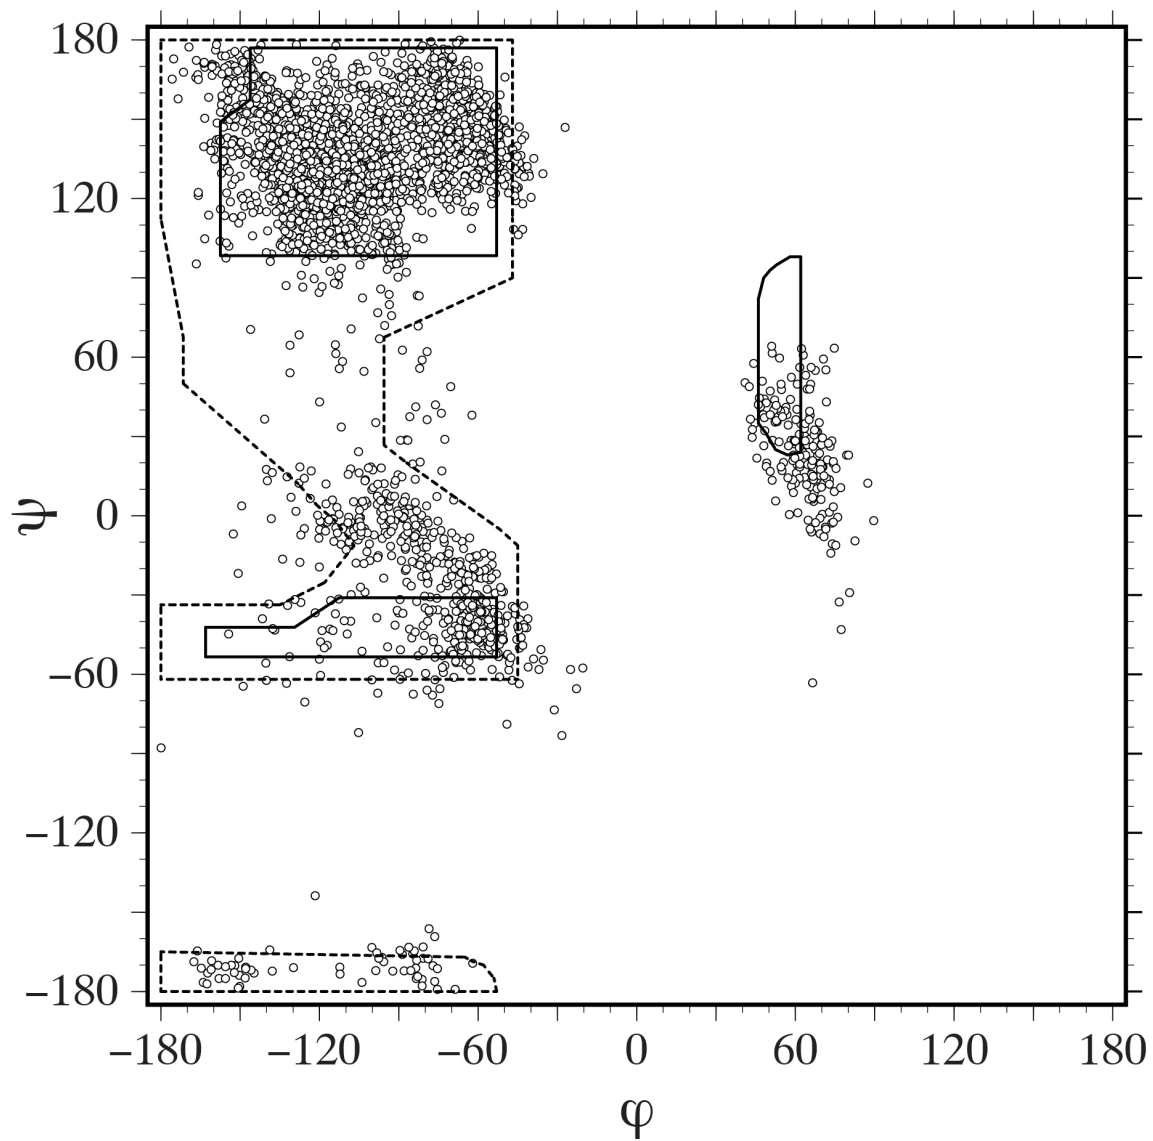

Figure S1

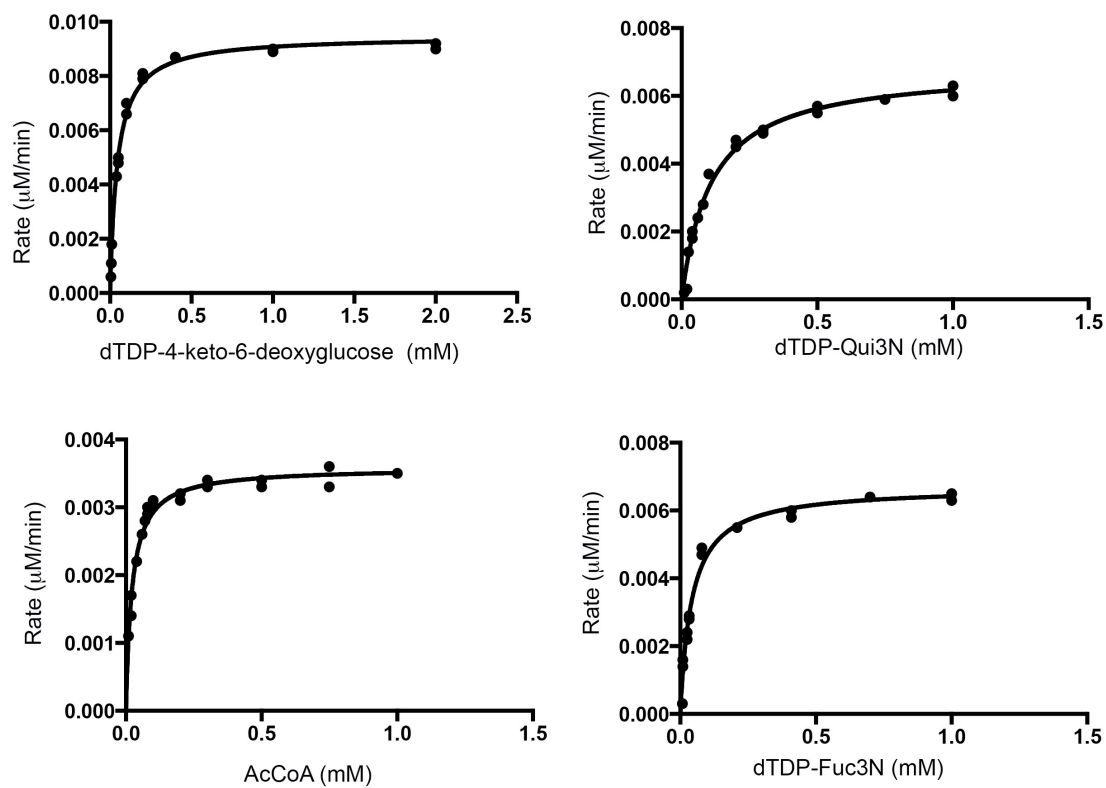

Figure S2 Substrate Saturation Curves

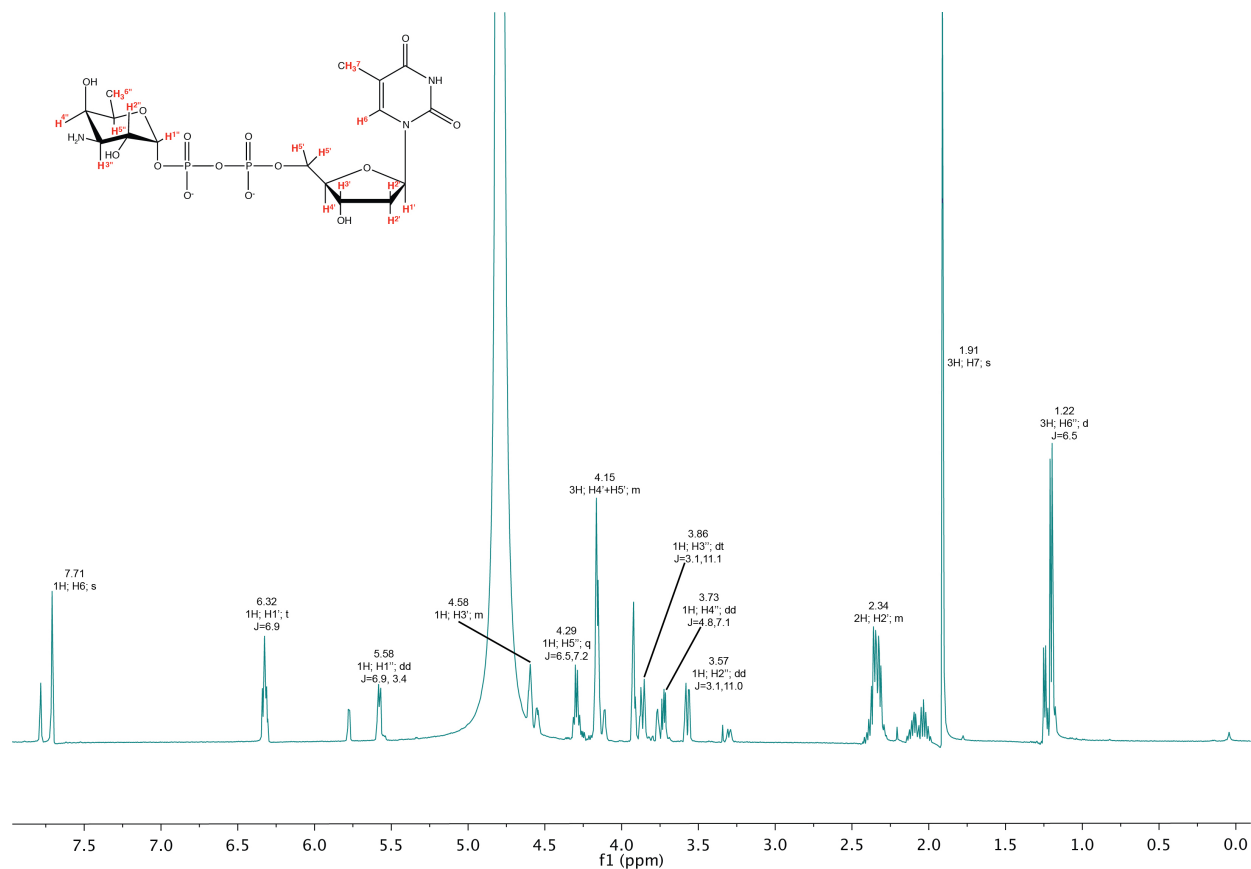

Figure S3

<sup>1</sup>H NMR spectrum of the ketoisomerase product from FtdD following transamination to generate a stable 3-amino sugar. As the sugar was purified via HPLC and lyophilized to dryness, minor breakdown products of the nucleotide-linked sugar, or minor contaminants acquired during HPLC assays, were present in the NMR spectrum. These are noted in the small, unlabeled peaks on the spectrum.

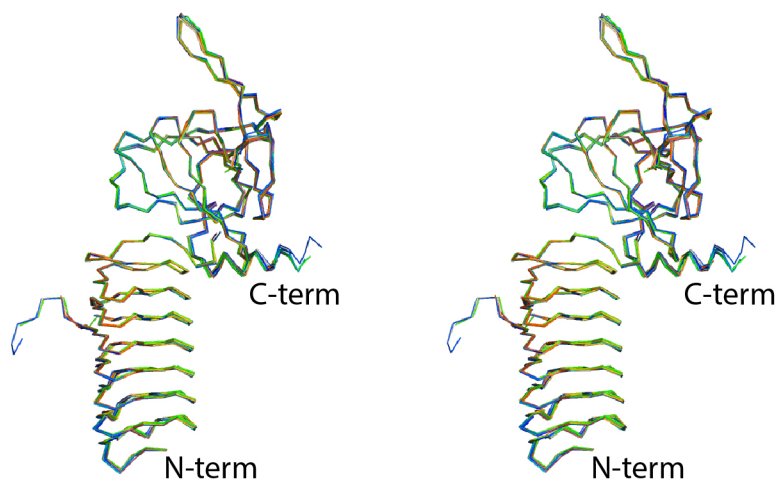

Figure S4

Shown in stereo is an overlay of all twelve subunits in the asymmetric unit.

Figure S5

Amino Acid Sequence Alignments of the Class A Bifunctional Enzymes (colored in red are the cupin domains)

|                     |     |                                                                                    |     |
|---------------------|-----|------------------------------------------------------------------------------------|-----|
| <u>AFC34907</u>     | 1   | MSLINLINFPILGDDRGSLIAIESNKTIPFEIKRVYYIFDTKKDIARGFHAKNLSQILFCVKGSCRIVLDDGFRR        | 76  |
| <u>WP_005327799</u> | 1   | MSLIKLIDLPSLGDQRGGLVAIESNQSIQFEIKRLYYIFNTT-NQSRGFHAHIDLKQVAVCVKGS CRFILDNGHTR      | 75  |
| <u>WP_005289027</u> | 1   | MSLKKLIDLPLDGDQRGGLVAIEANQHIFPEIKRIYYIFSASKDKPRGFHAHKDLKQLAICLHGQCRF ILDDGYSK      | 76  |
| <u>WP_009512147</u> | 1   | MSLKKLIDLPLDGDQRGGLVAIEANQHIFDIKRIYYIFSASKNKPRGFHAHKDLKQLAICLHGQCRF ILDDGYSK       | 76  |
| <u>AFC34907</u>     | 77  | ECVTLSEPNKGILVENLVWREMHDFSDDCVLLVVLASQHYDESDYIRHYDDFLNEIHRPFMHHLSDVKCQNI GKNTRVWQY | 156 |
| <u>WP_005327799</u> | 76  | EEVTLNSPTQGLYIDALTWREMHDFSEDCVLLVVLASQHYDESDYIRDYQEFLEKVKHPFIHPLADVKSQKIGQKTKIWQF  | 155 |
| <u>WP_005289027</u> | 77  | EEVLLNSPTQGLIIESMTWREMHDFSEDCVLLVVLASEHYDESDYIRSYDEFISVVNRPFHPLSDVHSPHIGQNT RVWQY  | 156 |
| <u>WP_009512147</u> | 77  | EEVLLNSPTQGLIIESMTWREMHDFSEDCVLLVVLASEHYDESDYIRSYDEFISVVNRPFHPLSDVHSPHIGQNT RVWQY  | 156 |
| <u>AFC34907</u>     | 157 | VVIFEHAQIGENCNICSHCLIENDVIGNNVTIKSGVFLWDGIYVGDNVFIGPNATFTNDRVPRSKQYPDKFMKT VIKEG   | 236 |
| <u>WP_005327799</u> | 156 | SVVLQNAMIGENCNICAHTLIENDVIGNNVTIKSGVYVWDGITLEDNVFIGPCVAFTNDKKPRSKQYPEKFPQTIVEMG    | 235 |
| <u>WP_005289027</u> | 157 | SVILKNAVIGAGCNICAHTLIENDVHIGDNVTVKSGVYLWDGITLEDNVFIGPSVAFTNDKKPRSKQYPDSFAKT VVEQG  | 236 |
| <u>WP_009512147</u> | 157 | SVILKNAVIGAGCNICAHTLIENDVHIGDNVTVKSGVYLWDGITLEDNVFIGPSVAFTNDKKPRSKQYPDSFAKT VVEQG  | 236 |
| <u>AFC34907</u>     | 237 | ASIGANATILPGITIGKNAMIGAGAVVTKDVL DNEIVIGNPARVKG----                                | 282 |
| <u>WP_005327799</u> | 236 | ASIGANATILPGIRIGQNALIGAGAVVTKDVPANAIVVGNPAIIKGYV--                                 | 283 |
| <u>WP_005289027</u> | 237 | ASIGANATILPGIRIGKNALIGAGAVVTKDVPENAIMVGNPAIIKGYIeq                                 | 286 |
| <u>WP_009512147</u> | 237 | ASIGANATILPGIRIGKNALIGAGAVVTKDVPENAIMVGNPAIIKGYIeq                                 | 286 |
| <u>AFC34907</u>     |     | <i>Pasteurella multocida</i>                                                       |     |
| <u>WP_005327799</u> |     | <i>Acinetobacter</i> sp. CIP 102143                                                |     |
| <u>WP_005289027</u> |     | <i>Acinetobacter</i> sp. NIPH 3623                                                 |     |
| <u>WP_009512147</u> |     | <i>Acinetobacter baumannii</i>                                                     |     |

Amino Acid Sequence Alignments of the Class B Bifunctional Enzymes (colored in red are the cupin domains)

|                              |    |                                                                                    |     |
|------------------------------|----|------------------------------------------------------------------------------------|-----|
| <a href="#">YP 563661</a>    | 1  | M-----IHKLADVQSQNIGDNTKVWQFCVILAGAVIGRNCNICANSLIENDVVIGDNVTIKSGVQIWDGIHIQDDVFI     | 73  |
| <a href="#">YP 522503</a>    | 1  | MSQ--pF-IHTLADVHSTTIGTGTRIWQFVVALAGAKIGQDCNVC SHCLIENDVVIGDRVTVKSGVQLWDGLRVGDDVFI  | 77  |
| <a href="#">YP 001269238</a> | 1  | MSGnrnFFVHSHALCESENIGDTRVWAFAHILPGASLGRECNVCDNVFIENDVVIGDRVTLKCGVQIWDGITIEDDVFI    | 80  |
| <a href="#">WP 006465577</a> | 1  | -----MKIHPSADVQTSQIGTDTTIWQYVVILAGARIGRDVNINAHCFIENDVTIGDRVTIKSGVYLWDGIRVEDDVFI    | 74  |
| <a href="#">WP 007835313</a> | 1  | MNP--pF-IHSEADVKSTAIGDGTRIWQFSVVFEGAKIGSDCNICSHTLVESDVIIGDRVTVKSGVQLWDGLRVANDVFI   | 77  |
| <a href="#">NP 790904</a>    | 1  | MSSgkdFFVHSHALCESENIGKDSRVWAFAHILPGARLGSECNVCDNVFIENDVIGDRVTLKCGVQVWDGITIEDDVFI    | 80  |
| <a href="#">WP 003365665</a> | 1  | MSSgkdFFVHSHALCESENIGKDSRVWAFAHILPGASLGSECNVCDNVFIENDVIGDRVTLKCGVQVWDGITIEDDVFI    | 80  |
| <a href="#">WP 006890961</a> | 1  | MKN---YYVHPQAICESNNTNTRIWAFAHILPNAKIGEECNICDGVFVENDVVVGNRVTIKCGVQLWDGVELEDDVFI     | 77  |
| <a href="#">WP 008212526</a> | 1  | MPQ--pVHVHALADVQTASIGAGTHIWQFVVALPGARIGNDCNICSHCFIENDVVIGDRVTIKNGVQLWDGLRVGDDVFI   | 78  |
| <a href="#">WP 005793127</a> | 1  | MLN--eVQIHPTAEVLTENIGSGTTIWQMVVVLKGAIVIGKNVNICAQCFIEDDVVIGDRVTVKSGVYLWDGVRLGDDVFI  | 78  |
| <a href="#">YP 002138423</a> | 1  | MKY----FVHDKALVLESSKIGNNTRVWAFAHILPGATVGSECNICDNVFIENDVVLGERVTVKCGVQLWDGVVLEDDVFI  | 76  |
| <a href="#">YP 006720291</a> | 1  | MK-----IHPLSDVQAKQIGQGTSIWQYVVVLPGAVIGSDCNICSHCFIENAVVIGDRVTIKCGVQIWDGLRVEDDVFI    | 74  |
| <a href="#">YP 005635798</a> | 1  | M-S---YFVHPNALCESENIGEGTRVWAFAHVLPGARLGRDCNICDGVFVESDVIIGDRVTVKCGVQLWDGVRLGDDVFI   | 76  |
| <a href="#">YP 521972</a>    | 1  | MSA---YFKHSHALVETDNIGAGTRIWAFAHILPGARIGSGCNICDGVFIESDVVVGGDDVTIKCGVQLWDGITIESGVFI  | 77  |
| <a href="#">NP 636007</a>    | 1  | M-S---HFVHPNALCESDITIGEGTRVWAFAHVLPGARLGRDCNICDGVFIESDVVVGGDRVTVKCGVQLWDGVRLGDDVFI | 76  |
| <a href="#">WP 008903201</a> | 1  | MNDsv--YFHPQALCESLSVGARTRIWAFAHILPEARIGADCNICDHVFVENQVTVGDRVTIKCGVQLWDGISVEDDVFI   | 78  |
| <a href="#">YP 995492</a>    | 1  | MPD-y--FVHPQALCESTAVGAGTRIWAFAHVLPGARIGADCNVCDHVF IENDVWLADRVTIKCGVQLWDGIRLESDFVFI | 77  |
| <a href="#">YP 826939</a>    | 1  | MHS-----AIVETRSLGGGTTVGAFAHILPGAVIGVDCRIGGQTFIENDVRIGDRVTLENGQVWDGITIEDDVFI        | 71  |
| <a href="#">WP 007192445</a> | 1  | MTEqa-YFVHPAGICESSTIGAGTRIWAFSHVLPGARVGGDCNICDHVF IENDVNLGDRVTIKSGVQLWDGIRVGDDVFI  | 79  |
| <a href="#">WP 009102868</a> | 1  | MPS---PFIHPLSDCQSTNIGEGTRVWQFSVVLPEAKVGEDCNICSHCFIENDVVIGNRVTVKCGVQLWDGIRVEDDVFI   | 77  |
| <a href="#">WP 005048231</a> | 1  | MTGsgdYFVHPQIGICESTKIGGGTRVWAFSHVLPGAVLGADVNVNDHVF IENDVIGDRVTLKSGVQVWDGIQLGDDVFI  | 80  |
| <a href="#">YP 003806326</a> | 1  | MQSs-----KLCHLCAGATIAASARLGDHVVVYPGATVADDCLVAGFTQLWPGVRLERGA                       | 57  |
| <a href="#">YP 563661</a>    | 74 | GNVTFFTNDKQPRSKIYPDEYLKTIIVKKGASIGANSTILPGILIGENAMVGAGAVITKNVPDNAIVIGNPGRITGYVEA-  | 152 |
| <a href="#">YP 522503</a>    | 78 | GNASFANDRFPRSKITPEKFLQTEVEKEGASIGAGATILPGITIGRNAMVAAGAVVTRSVPNAIVVGNPAKIVGYVDA-    | 156 |
| <a href="#">YP 001269238</a> | 81 | GNATFTNDLFPFRSKVYPQTFRSRTIIRKASLGANCTILPGLTIGINAMVGAGAVVTRSIPPNAIVVGNPAKIIIGYVDAK  | 160 |
| <a href="#">WP 006465577</a> | 75 | GNVTFFTNDKFPFRSKVYPERFVETTLERGASIGGGATILPGVHIGRGALVGAGAVVTKSVPPYAVVTGCPARITGYVDAG  | 154 |
| <a href="#">WP 007835313</a> | 78 | GNASFANDRFPRSRKKPTKFLGSTLHEGASIGAGAVILPGIEIGRNAMVAAGAVVTRSVPANAIVVGNPAKIVGYVDA-    | 156 |
| <a href="#">NP 790904</a>    | 81 | GNATFTNDLFPFRSKVYPQTFARTIIRKASLGANCTILPGITIGINAMVGAGAVVTRSVPNAIVVGNPAKIIIGYVDAK    | 160 |
| <a href="#">WP 003365665</a> | 81 | GNATFTNDLFPFRSKVYPQSFARTIIRKASLGANCTILPGITIGINAMVGAGAVVTRSVPNAIVVGNPAKIIIGYVDAK    | 160 |
| <a href="#">WP 006890961</a> | 78 | GNVTFFTNDKFPFRSKVYPENFARIVISKGASIGANATLLPNITVGVNAMIGAGAVVTRSVPNAIVVGNPAKIVGYVDAK   | 157 |
| <a href="#">WP 008212526</a> | 79 | GNVTFSTNDKFPFRSKQHLATALLTEIESGASLGAGATILPGLKIGRHAMVGAGAVVTRSVPANAIVVGNPARIVGYADA-  | 157 |

|                     |     |                                                                                   |     |
|---------------------|-----|-----------------------------------------------------------------------------------|-----|
| <u>WP 005793127</u> | 79  | GPNVTFTNDKFPFRSKQHLEALVTRVEAGASIGGGAVVLPGLIVGRGAMVAGAVVTKSVPPYAIVTGSPARIMGYVENT   | 158 |
| <u>YP 002138423</u> | 77  | GPNATFTNDLFPFRSKKYPEQFAKTIVRQASIGANATILAGVCIGKNAMVAGAVVTKNVPNAIVVGNPARIHGYVTSK    | 156 |
| <u>YP 006720291</u> | 75  | GPNVTFTNDLFPFRSKQHPKEFAKTVIQKGASIGANATILAGSTIGRNAMVAGAVVTKSVPPNAIVVGNPARITGYVSTI  | 154 |
| <u>YP 005635798</u> | 77  | GPNATFTNDLFPFRSRVYPEKFLGTVVESGASIGANATILAGTTIGSGAMIGAGAVVTRSVPPNAIVVGNPARIVGYV--- | 153 |
| <u>YP 521972</u>    | 78  | GPNVTFTNDNFPRSKQYLKAPERTLVQAHSSIGANATILPGVTVAPGAMIGAGSVVTRSVPPNAIVQGNPARIVGYTNTK  | 157 |
| <u>NP 636007</u>    | 77  | GPNATFTNDLFPFRSRVYPEKFLGTVVESGASIGANATILAGTTIGSGAMIGAGAVVTRSVPPNAIVVGNPARIVGYV--- | 153 |
| <u>WP 008903201</u> | 79  | GPNATFANDNFPRSRQRPDQYARTVIQKGASIGANATILPGIIVGPKAMVAGAVVVRDVPARAIIVVGNPARIVGYAEEA  | 158 |
| <u>YP 995492</u>    | 78  | GPNATFSNDRFPFRSRQRPPEAFARTVVRQASIGANATLLPGITVGAQAMVAGAVVTRSVPPKAIIVVGNPAKIVGYVQTP | 157 |
| <u>YP 826939</u>    | 72  | GPNATFSNDPFPFRSRQHPAEFARTLIRRGASIGANATILPGLTIGEKAVVEAGAVVTRDIPPLAIVAGNPARISGYVGAG | 151 |
| <u>WP 007192445</u> | 80  | GPNATFTNDRFPFRSKRYPESFAVTTLEDGASIGANATILPGLTIGKRAMVAGAVVTRSVPPNAVAGNPAQIIGYQSAS   | 159 |
| <u>WP 009102868</u> | 78  | GPNVTFTNDRFPFRSQYQYVDRFAQTVIKRGASIGANATLLPGITVGDAMVAGAVVTSVDPVPGAVVGNPAAVRRYAQIP  | 157 |
| <u>WP 005048231</u> | 81  | GPNATFTNDPFPFRSKQYQYVDRFAQTVIKRGASIGANATLLPGITVGDAMVAGAVVTSVDPVPGAVVGNPAAVRRYAQIP | 160 |
| <u>YP 003806326</u> | 58  | GPGVTIQPPD-----EADASTVSGPNCRIGANATILRGVVRVGEAGVVEPGSVVAQSVPPHAIIVSGAPARITGYVDSR   | 130 |
|                     |     |                                                                                   |     |
| <u>YP 563661</u>    | 153 | NTGVIMPS----NNFELK---LQM-SKVKGVSLHKFHLVNDLRGNLSVGEFEKDIPTPKRYFTVFGVNPKEVRGEHAHK   | 224 |
| <u>YP 522503</u>    | 157 | DRNKGDIG----EGQAVIVGA-QE-TQVRGVSLHRMPRVIDIRGSLTVGEFDRSIPFAVKRYFMVFDVPSMETRGEHAHR  | 230 |
| <u>YP 001269238</u> | 161 | PVSTKAEN----EVTPTYSEGAE--TSVKGVKLHTMKVTDIRGSLVGEFERSIPFKTERYFLVYDVPTAETRGEHAHR    | 234 |
| <u>WP 006465577</u> | 155 | EQPREEDR---vEMPSEDRVVAL--DVKGVTLHRLKQVSDIRGDLVGEFEPVDIPFVPSRYFLVYNVPSEKTRGEHAHH   | 229 |
| <u>WP 007835313</u> | 157 | S-DQODGA----APQPSRPGA-SA-TRVTGVNLHRLLRVADIRGSLTVGEFERTIPFNAKRYFMVFDVPSIETRGEHAHR  | 229 |
| <u>NP 790904</u>    | 161 | PVNANSET----RAEQKAPGVTA--TSVKNVTLHTMNEVADIRGSLVGEFERSVPPFKTERYFLVYDVPTAETRGEHAHR  | 234 |
| <u>WP 003365665</u> | 161 | PVNASSET----RPEKAAPGVTA--TSVKNVTLHTMNEVADIRGSLVGEFERSVPPFKSERYFLVYDVPTAETRGEHAHR  | 234 |
| <u>WP 006890961</u> | 158 | NDKIASSE----KLNHQKQKLE--TTVSGVTLHNFRAVPDMRGSLVGEFEREIPFRPLRYFLVFDVPTAETRGEHAHI    | 231 |
| <u>WP 008212526</u> | 158 | QSGGLDK----VTEAAATGTVQS-SRVAGVSLVTLPRITDIRGSLTVGEFQRVVPEAKRYFMVFDVPSVETRGEHAHR    | 232 |
| <u>WP 005793127</u> | 159 | ASAKPDGRpralVVPVAVANSVEQV--VGVDVALHRMKFVQDMRGNSLVGEFEKDVPPAKRYFLVFSVPSEKTRGEHAHR  | 236 |
| <u>YP 002138423</u> | 157 | PAAASVPQ--kspSOMPEEF-----KSLTGTTLHRMPIITDMRGSLSSGELAKMLPFIPKRYFLVFDVNPKEVRGEHSHK  | 229 |
| <u>YP 006720291</u> | 155 | PAQQ---K-hseIEVGENIGTVGQ-SAIPGVQFVRLPIIPDLRGSLVFAEFQYLPFIPKRYFLVFDVQSREVRGEHAHK   | 229 |
| <u>YP 005635798</u> | 154 | SDKDANQP----AALPVDQGITD--TAVPGVKLYRMPFADMRGSLVSGDFDSFLPFNARRYFLVYGVPTQETRGEHAHK   | 227 |
| <u>YP 521972</u>    | 158 | AQGSTEPQ---LfkDERKPPYSdrTAARGVTVHKFPLIPDIRGSLTVGEFQHIIPFVPKRYFLVFDVPSKETRGEHAHR   | 233 |
| <u>NP 636007</u>    | 154 | SDKDATGS----APSPTGQGITD--TAVPGVKLYRMPFADMRGSLVSGDFETFLPFNAKRYFLVYGVPTQETRGEHAHK   | 227 |
| <u>WP 008903201</u> | 159 | FQVGGGTat----QISSQEQPSVRaTGVRGVTLHKLKNVADMRGSLVMEMEDGIPFTARRSFLVYDVPSEEIRGEHAHR   | 234 |
| <u>YP 995492</u>    | 158 | ---GAKTGt-----PGPRpTGVDGVTLHHLHQVQDMRGSLVSAEFGSDVPFAVRRYFLVFDVPSMQVRGEHAHH        | 223 |
| <u>YP 826939</u>    | 152 | SISADATat-----APPELGVRpTRVAGVMLHRLPQVDDLGRNLSFGEIGEQQVFAVKRYFVVYGVPSKNIRGEHAHR    | 224 |
| <u>WP 007192445</u> | 160 | ESKQARLgTlsvLEASRLAVEGLPaLAVKGCGLVQLPVFNDLRGDLMVAQFDRHLPFSPKRVFVYHVPNDHVRGEHAHR   | 239 |
| <u>WP 009102868</u> | 158 | SSPQAIDAs-----ASLGAELIGGCQMLELPTITDMRGKLTIAQWDQHLPSPERTFFVHHVPSSEKIRGEHAHR        | 226 |
| <u>WP 005048231</u> | 161 | EPTAARGPvg-----DPGAAEG-----ITRLRTVSDIRGALLPIDLPGDLPTPQRVFVHGVPSKEVRGEHAHR         | 225 |
| <u>YP 003806326</u> | 131 | SAQQVLAWrg--QAEVQETGAVVR-LDVGdVTLHRLSLVHDPRGDLVFGFARDIPFAVKRYFMVFNVPSEKVRGEHAHR   | 207 |
|                     |     |                                                                                   |     |
| <u>YP 563661</u>    | 225 | ECKQFLICVSGNCSVLVDDGENREEYVLDSIDKGIYLPMTWGVQYKYSKDAVLLVFASHYYDSDDYIRDYSTFKQMRON   | 304 |
| <u>YP 522503</u>    | 231 | VCHQFLICVRGCCAVVADDGTHRQEFLLDRPDVGIHLPMPVWGIQYKYSADAVLLVYASHYYDNADYIRNYSEFRQLVGA  | 310 |



|                     |     |                                                                                  |     |
|---------------------|-----|----------------------------------------------------------------------------------|-----|
| <u>YP 001269238</u> | 235 | ECHQFLVAVKGSVHVVADDGINREEFVLDKPNKGIHLPMTWGIQYRYSQDAVLMVFASHYYDADDYIRNYDEFKSLINS  | 314 |
| <u>WP 006465577</u> | 230 | KCRQFLICVKGSCSVVADDGRSRIEVLDDSPDLGIYLPPLTWGTQYKYSSDAVLLVFASDSYDAQDYIRDYESFLQTVSP | 309 |
| <u>WP 007835313</u> | 230 | ECHQFLICVRGSCSVVADDGFNRQEFLLDRQDLGIHIPPMIWIQYKYSQDAVLLVFASHYYNEADYIRDYSEFQKLIEM  | 309 |
| <u>NP 790904</u>    | 235 | ICHQFLVAVKGSVHVVADDGVNREEFILDKPNQGIHLPMTWGIQYRYSQDAVLLVFASHYYDAGDYIRNYEEFKSLI-A  | 313 |
| <u>WP 003365665</u> | 235 | ICHQFLVAVKGSVHVVADDGVNREEFILDKPNQGIHLPMTWGIQYRYSQDAVLLVFASHYYDAGDYIRNYEEFKSLI-A  | 313 |
| <u>WP 006890961</u> | 232 | KCQQFLIAVKGSVRVVDGKNREEFLLDRNNSGLYLPAMTWGIQYHYSQDAVLLVFASEYYESSDYIRNYSDFIEAAKN   | 311 |
| <u>WP 008212526</u> | 233 | QCHQFLICVRGRVSVVADDGVHREEFLLDRPNLGLHLSPMVWGIQYKYSADAVLLVFASHYYDGADYIRDYSEFVKLTGA | 312 |
| <u>WP 005793127</u> | 237 | ECHQFLICVKGSCAVVDDGKSRCEVLLDDSPDLGLHLPMTWGIQYKYSADAVLLVFTSHDYDAADYIRSYAEFVALVDE  | 316 |
| <u>YP 002138423</u> | 230 | QLHQFLVCVKGACSLLVDDSVHREEILLNSPNIGAHIPPMVWGVQYNFSPDAVLMVLASDAYDPDDYVRNYDDFLAMRGA | 309 |
| <u>YP 006720291</u> | 230 | ELHQFLVCVKGACSVVDDGNCREEYILNTPGAALHIPPLVWGVQYKYSQDAVLMVLASDVYKPEDYIRDYDQFIALVKK  | 309 |
| <u>YP 005635798</u> | 228 | RCHQFLICVSGSVRVLADDGTRRIDVELNSPNQGIHLPMTWGTQYKYSKDAVLLVFASEPYDSDEYIRDYADFKSLANA  | 307 |
| <u>YP 521972</u>    | 234 | TCHQFLICIRGSCSVLADDGLNRTEVHLDSPDKGIYLPMTWGIQYKYSQDAVLLVFASHNYDAADYIRSYSEFLEEVENQ | 313 |
| <u>NP 636007</u>    | 228 | RCHQFLICVSGSVRVLADDGTRRIDVELNSPQGIHLPMTWGTQYKYSKDAVLLVFASESYDTDEYIRDYSDFKSLANA   | 307 |
| <u>WP 008903201</u> | 235 | RCAQFLVAVKGRHLHAVADDGARREEFVLDSPDLGLYLPMTWGVQYRYSQDAVLLVLASEHYEPHDYIRDYDEF--LQAA | 312 |
| <u>YP 995492</u>    | 224 | QCRQFLVAVKGSVHVLADDARHSEEFILDRPALGLLPPMTWSVQYRYSQDAVLLVLASEHYDPEDYIRDYDRFVVLARA  | 303 |
| <u>YP 826939</u>    | 225 | ALHQFLICVHGRCHVVGDGVRQEFVLDRLPSLGLHIPPMVWASQYKYSQDAVLLVLASENYDPASYIRDYSEFVQLVSV  | 304 |
| <u>WP 007192445</u> | 240 | ECAQFLVALNGALSVVDDGAERQEIRLDYPGVGLLIPPLVWGIQYRFSAVAVLAVFASHDYESNEYIRDYDEFRLRVTA  | 319 |
| <u>WP 009102868</u> | 227 | ECQQVLVAISGHVEVVIDDGRQRQVALNDRQALHIPAGVWATQYGYSSDCVLLVVFASHNYDES DYIRDYDAFRKFRGV | 306 |
| <u>WP 005048231</u> | 226 | RCEQFLVCLTGSVSCIVDDGHDRREFVLDSPSMGLHMPMTWGTQYRYSADAVLVCVFASELYDDSDYIRDYEEFLALANG | 305 |
| <u>YP 003806326</u> | 208 | VCHQFLICAKGGCAVVVDDGATRCEVFLDDSPDLGLYLPMTWGTQYKCSGDTLLCVFTSHYYDPADYIRDYAEFLALVHK | 287 |

|                     |     |              |     |                                                                |
|---------------------|-----|--------------|-----|----------------------------------------------------------------|
| <u>YP 563661</u>    |     | -----        |     | <i>Shewanella denitrificans</i> OS217                          |
| <u>YP 522503</u>    | 311 | SA-----      | 312 | <i>Rhodoferax ferrireducens</i> T118                           |
| <u>YP 001269238</u> | 315 | HLs-----     | 317 | <i>Pseudomonas putida</i> F1                                   |
| <u>WP 006465577</u> | 310 | KDeis-----   | 314 | <i>Herbaspirillum frisingense</i>                              |
| <u>WP 007835313</u> | 310 | KI-----      | 311 | <i>Variovorax</i> sp. CF313                                    |
| <u>NP 790904</u>    | 314 | NAe-----     | 316 | <i>Pseudomonas syringae</i> pv. <i>tomato</i> str. DC3000      |
| <u>WP 003365665</u> | 314 | NAe-----     | 316 | <i>Pseudomonas syringae</i>                                    |
| <u>WP 006890961</u> | 312 | NEpl-----    | 315 | <i>Methylobacter tundripaludum</i>                             |
| <u>WP 008212526</u> | 313 | SA-----      | 314 | <i>Rhodanobacter</i> sp. 115                                   |
| <u>WP 005793127</u> | 317 | GAa-----     | 319 | <i>Acidovorax delafieldii</i>                                  |
| <u>YP 002138423</u> | 310 | V-----       | 310 | <i>Geobacter bemidjiensis</i> Bem                              |
| <u>YP 006720291</u> |     | -----        |     | <i>Geobacter metallireducens</i> GS-15                         |
| <u>YP 005635798</u> | 308 | AG-----      | 309 | <i>Xanthomonas campestris</i> pv. <i>raphani</i> 756C          |
| <u>YP 521972</u>    |     | -----        |     | <i>Rhodoferax ferrireducens</i> T118                           |
| <u>NP 636007</u>    | 308 | AR-----      | 309 | <i>Xanthomonas campestris</i> pv. <i>campestris</i> ATCC 33913 |
| <u>WP 008903201</u> | 313 | VTrpt-----sp | 319 | <i>Acidovorax</i> sp. NO-1                                     |
| <u>YP 995492</u>    | 304 | LHrppaagidsp | 315 | <i>Verminophrobacter eiseniae</i> EF01-2                       |
| <u>YP 826939</u>    | 305 | LK-----      | 306 | <i>Candidatus Solibacter usitatus</i> Ellin6076                |

|                              |     |             |     |                                       |
|------------------------------|-----|-------------|-----|---------------------------------------|
| <a href="#">WP 007192445</a> | 320 | PEspt-----  | 324 | <i>Thiocapsa marina</i>               |
| <a href="#">WP 009102868</a> | 307 | EE-----     | 308 | <i>Rhodopirellula</i> sp. SWK7        |
| <a href="#">WP 005048231</a> | 306 | N-----      | 306 | <i>Microbacterium laevaniformans</i>  |
| <a href="#">YP 003806326</a> | 288 | SPnnaa----- | 293 | <i>Desulfarculus baarsii</i> DSM 2075 |

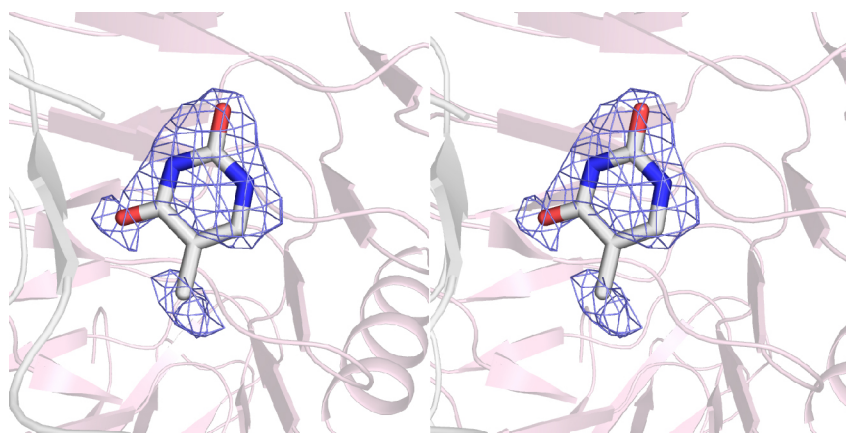

Figure S6

Electron density corresponding to a thymine molecule at low occupancy. The omit map, contoured at  $2\sigma$ , was calculated at 2.2 Å resolution with coefficients of the form  $F_o - F_c$ , where  $F_o$  was the native structure factor amplitude and  $F_c$  was the calculated structure factor amplitude (the ligand was not included in the X-ray coordinate file so it did not contribute to the phasing).
